# Supplementary material for: Antioxidant and Anti-Skin Aging Potential of Selected Thai Plants: In Vitro Evaluation and In Silico Target Prediction
Source: MDPI journal article supplement (doi:10.3390/plants12010065), 2022-12-22
Supplement: s1 [file s1]

## Supplementary Materials

### Antioxidant and Anti-Skin Aging Potential of Selected Thai Plants: In Vitro Evaluation and In Silico Target Prediction

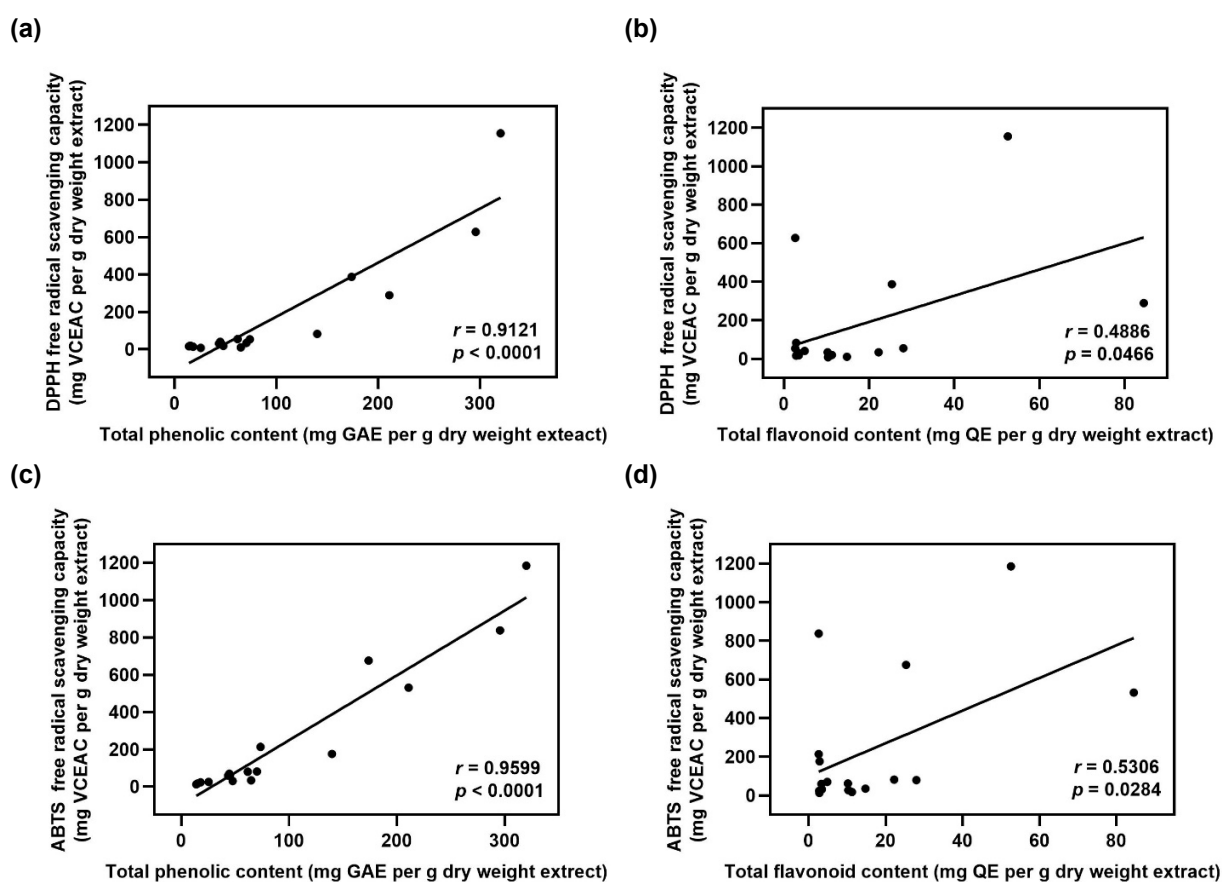

**Figure S1.** Correlation analysis between phytochemical contents and antioxidant capacities among the studied plants. The correlations are expressed as Pearson's correlation coefficients ( $r$ ) between **(a)** total phenolic content and DPPH free radical scavenging activity, **(b)** total phenolic content and ABTS free radical scavenging activity, **(c)** total flavonoid content and DPPH free radical scavenging activity, **(d)** total phenolic content and ABTS free radical scavenging activity.

**Table S1.** The percent inhibition of elastase activity by Thai plants at various concentrations.

| <i>Anacardium occidentale</i> L. (Leaf)                |                |
|--------------------------------------------------------|----------------|
| Concentration (µg/ml)                                  | Inhibition (%) |
| 500.00                                                 | 84.78 ± 2.16   |
| 100.00                                                 | 78.09 ± 3.91   |
| 50.00                                                  | 71.73 ± 6.58   |
| 25.00                                                  | 62.23 ± 7.48   |
| 12.50                                                  | 36.87 ± 10.05  |
| 6.25                                                   | 7.90 ± 4.67    |
| <i>Areca catechu</i> L. (Fruit)                        |                |
| Concentration (µg/ml)                                  | Inhibition (%) |
| 500.00                                                 | 88.31 ± 0.41   |
| 250.00                                                 | 78.08 ± 4.51   |
| 125.00                                                 | 52.35 ± 10.44  |
| 62.50                                                  | 28.66 ± 2.80   |
| 31.25                                                  | 13.75 ± 1.30   |
| 15.63                                                  | 8.49 ± 2.19    |
| 7.81                                                   | 8.57 ± 4.85    |
| <i>Glochidion zeylanicum</i> (Gaertn.) A. Juss. (Leaf) |                |
| Concentration (µg/ml)                                  | Inhibition (%) |
| 500.00                                                 | 87.43 ± 3.80   |
| 100.00                                                 | 66.00 ± 10.67  |
| 50.00                                                  | 54.16 ± 10.29  |
| 25.00                                                  | 34.94 ± 18.68  |
| 12.50                                                  | 25.03 ± 16.41  |
| 6.25                                                   | 20.66 ± 9.82   |
| <i>Senna alata</i> (L.) Roxb. (Leaf)                   |                |
| Concentration (µg/ml)                                  | Inhibition (%) |
| 500.00                                                 | 73.95 ± 1.46   |
| 250.00                                                 | 65.61 ± 1.35   |
| 125.00                                                 | 57.85 ± 1.81   |
| 62.50                                                  | 44.81 ± 6.25   |
| 31.25                                                  | 29.04 ± 10.78  |
| 15.63                                                  | 19.75 ± 12.27  |
| 7.81                                                   | 16.19 ± 12.76  |
| <i>Streblus asper</i> Lour. (Leaf)                     |                |
| Concentration (µg/ml)                                  | Inhibition (%) |
| 400.00                                                 | 75.25 ± 8.25   |
| 200.00                                                 | 58.30 ± 2.26   |
| 100.00                                                 | 35.74 ± 0.94   |
| 50.00                                                  | 13.01 ± 4.66   |

Values show mean ± standard deviation (SD) of at least three independent experiments.

**Table S2.** The percent inhibition of tyrosinase activity by Thai plants at various concentrations.

| <i>Anacardium occidentale</i> L. (Leaf)                |                |
|--------------------------------------------------------|----------------|
| Concentration (µg/ml)                                  | Inhibition (%) |
| 2000.00                                                | 84.41 ± 4.30   |
| 1000.00                                                | 81.01 ± 2.96   |
| 500.00                                                 | 66.13 ± 8.01   |
| 250.00                                                 | 41.10 ± 11.78  |
| 125.00                                                 | 18.12 ± 10.02  |
| 62.50                                                  | 8.27 ± 2.64    |
| 31.25                                                  | 2.90 ± 0.79    |
| <i>Areca catechu</i> L. (Fruit)                        |                |
| Concentration (µg/ml)                                  | Inhibition (%) |
| 1000.00                                                | 75.38 ± 1.57   |
| 500.00                                                 | 72.94 ± 1.48   |
| 250.00                                                 | 66.88 ± 3.60   |
| 125.00                                                 | 60.94 ± 3.61   |
| 62.50                                                  | 41.82 ± 1.43   |
| 31.25                                                  | 30.14 ± 9.51   |
| 15.63                                                  | 24.86 ± 7.30   |
| <i>Glochidion zeylanicum</i> (Gaertn.) A. Juss. (Leaf) |                |
| Concentration (µg/ml)                                  | Inhibition (%) |
| 500.00                                                 | 90.43 ± 1.57   |
| 250.00                                                 | 87.70 ± 1.19   |
| 125.00                                                 | 74.47 ± 1.47   |
| 62.50                                                  | 38.05 ± 4.30   |
| 31.25                                                  | 5.45 ± 4.95    |
| <i>Mangifera caloneura</i> Kurz. (Leaf)                |                |
| Concentration (µg/ml)                                  | Inhibition (%) |
| 1000.00                                                | 76.12 ± 3.98   |
| 500.00                                                 | 52.96 ± 5.12   |
| 250.00                                                 | 34.55 ± 4.40   |
| 125.00                                                 | 21.92 ± 1.46   |
| 62.50                                                  | 12.53 ± 3.71   |

Values show mean ± standard deviation (SD) of at least three independent experiments.

**Table S3.** List of compounds derived from three most effective plants on inhibition against elastase and/or tyrosinase.

| Compound       | Structure                                                                           | Source                        | Reference |
|----------------|-------------------------------------------------------------------------------------|-------------------------------|-----------|
| Agathisflavone | 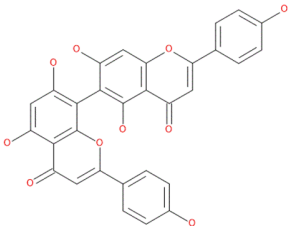   | <i>Anacardium occidentale</i> | [26]      |
| Aloe-emodin    |    | <i>Senna alata</i>            | [50,57]   |
| Amentoflavone  |   | <i>Anacardium occidentale</i> | [25]      |
| Apigenin       |  | <i>Senna alata</i>            | [55]      |
| Arecaidine     |  | <i>Areca catechu</i>          | [30,51]   |
| Arecatannin A1 |  | <i>Areca catechu</i>          | [31]      |

Arecatannin B1

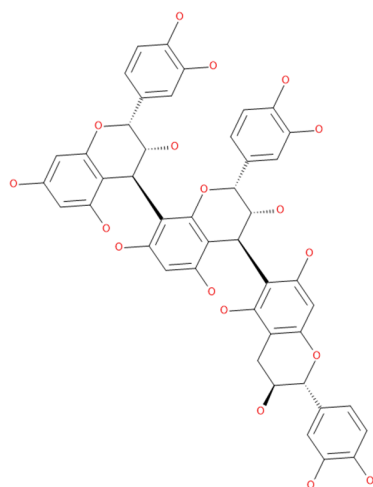

*Areca catechu*

[31]

Arecoline

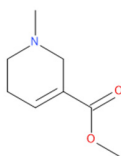

*Areca catechu*

[30,51]

Benzoic acid

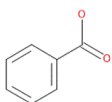

*Glochidion zeylanicum*

[42]

Caffeic acid

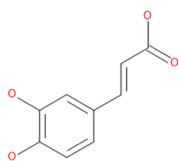

*Areca catechu*

[30]

Catechin

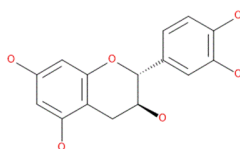

*Areca catechu*,  
*Anacardium occidentale*,  
*Glochidion zeylanicum*

[25,27,30-  
32,42,53,  
59]

Chrysoeriol

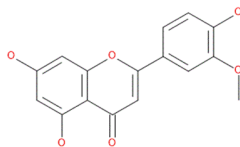

*Senna alata*,  
*Areca catechu*

[52,61]

Coumarin

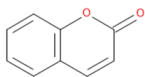

*Areca catechu*

[30]

Diosmetin

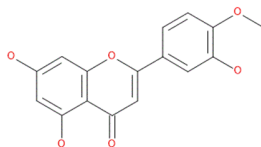

*Senna alata*

[57]

Emodin

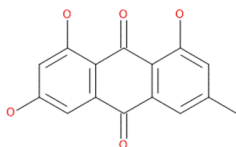

*Senna alata*

[50,54,57]

Epicatechin

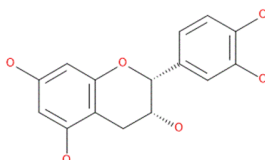

*Areca catechu*,

[25,30,31,

*Anacardium occidentale*

53,59,60]

Epigallocatechin

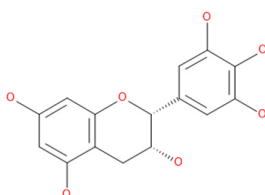

*Areca catechu*

[30,53]

Epigallocatechin gallate

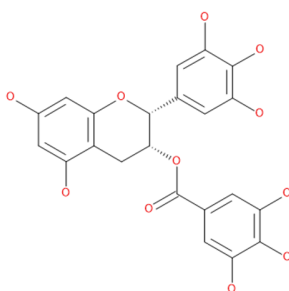

*Areca catechu*

[53]

Ferulic acid

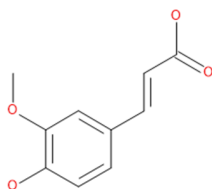

*Areca catechu*

[30]

Gallic acid

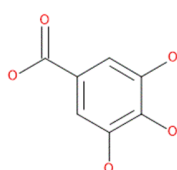

*Areca catechu*,

[27,30,32,

*Anacardium occidentale*,

42,53]

*Glochidion zeylanicum*

Gallocatechin

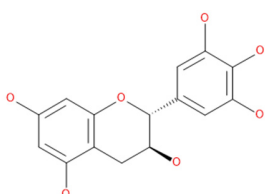

*Areca catechu*

[30]

Gallocatechin gallate

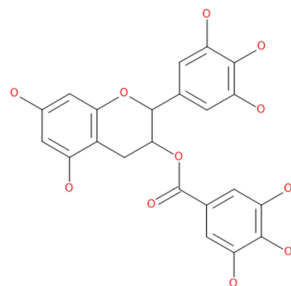

*Areca catechu*

[30]

Ginkgolide B

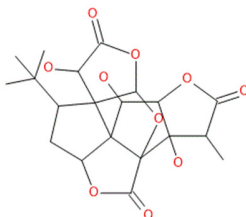

*Glochidion zeylanicum*

[42]

Glycitin

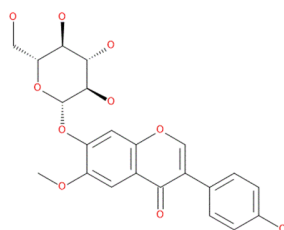

*Glochidion zeylanicum*

[42]

Guvacine

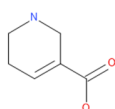

*Areca catechu*

[30,51]

Guvacoline

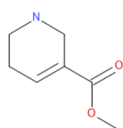

*Areca catechu*

[30,51]

Hexanedioic acid

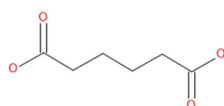

*Glochidion zeylanicum*

[42]

Isoquercetin

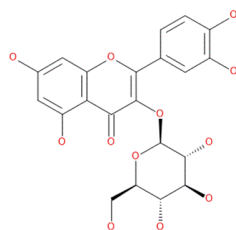

*Anacardium occidentale*

[27]

Isorhamnetin

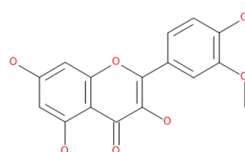

*Areca catechu*

[61]

Isorhamnetin-3-O-galactoside

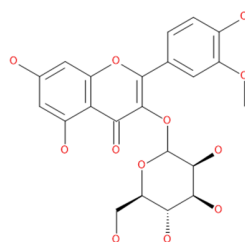

*Areca catechu*

[30]

Jacareubin

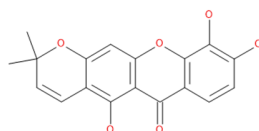

*Areca catechu*

[61]

Kaempferol

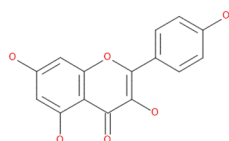

*Areca catechu*,  
*Senna alata*

[30,50,52,  
57,58]

Kaempferol 3-O-beta-L-glucopyranoside

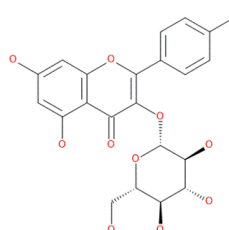

*Senna alata*

[52]

Kaempferol 3-O-gentiobioside

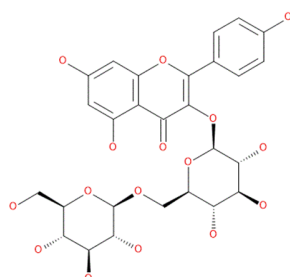

*Senna alata*

[28]

Kaempferol-3-O-glucoside

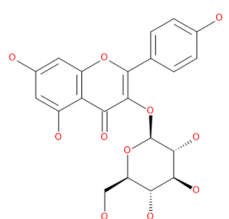

*Areca catechu*

[30]

Linoleic acid

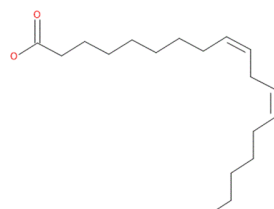

*Senna alata*

[54]



|                  |                                                                                     |                               |      |
|------------------|-------------------------------------------------------------------------------------|-------------------------------|------|
| L-proline        | 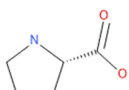   | <i>Glochidion zeylanicum</i>  | [42] |
| Luteolin         |    | <i>Areca catechu</i>          | [61] |
| Myricetin        |    | <i>Anacardium occidentale</i> | [25] |
| Myristic acid    |    | <i>Senna alata</i>            | [54] |
| Naringenin       |   | <i>Areca catechu</i>          | [30] |
| Naringin         |  | <i>Senna alata</i>            | [55] |
| n-dotriacontanol |  | <i>Senna alata</i>            | [52] |
| n-triacontanol   |  | <i>Senna alata</i>            | [52] |

o-Coumaric acid

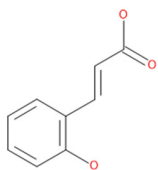

*Areca catechu*

[30]

Octadecatrienoic acid

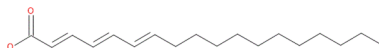

*Glochidion zeylanicum*

[42]

Oleic acid

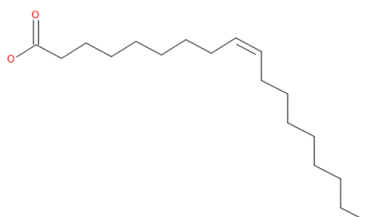

*Senna alata*

[54]

Oxyresveratrol

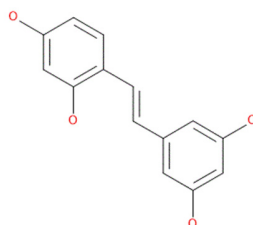

*Glochidion zeylanicum*

[42]

Palmitic acid

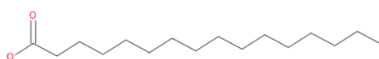

*Anacardium occidentale*, [32,42,52,

*Glochidion zeylanicum*, 54]

*Senna alata*

Pentadecanoic acid

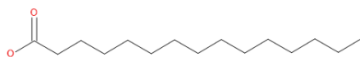

*Glochidion zeylanicum*

[42]

Phytol

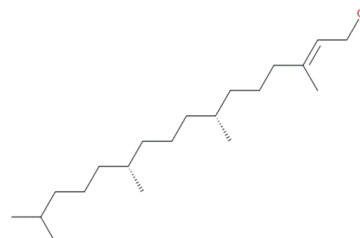

*Glochidion zeylanicum*

[42]

Quercetin

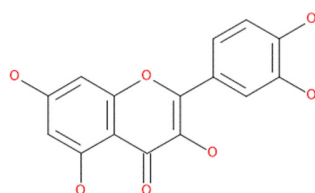

*Areca catechu*,

[25,26,30,

*Anacardium occidentale*, 32,42,52]

*Glochidion zeylanicum*,

*Senna alata*

Quercetin-3-O-galactoside

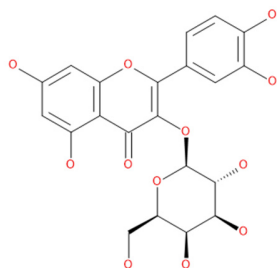

*Areca catechu*

[30]

Quinic acid

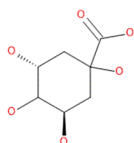

*Glochidion zeylanicum*

[42]

Resveratrol 4'-methyl ether

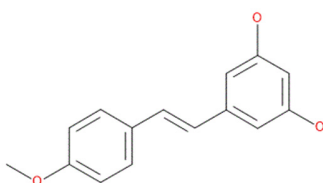

*Glochidion zeylanicum*

[42]

Rhein

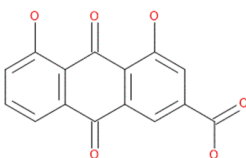

*Senna alata*

[50,54,56,  
58]

Rutin

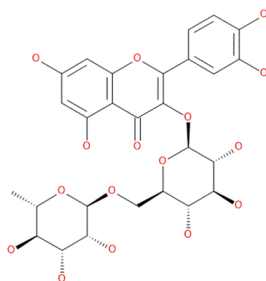

*Anacardium occidentale*

[26,27]

Stearic acid

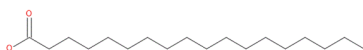

*Senna alata*

[52,54]

Syringic acid

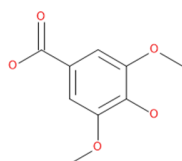

*Areca catechu*

[60]

Tetramer of proanthocyanidin

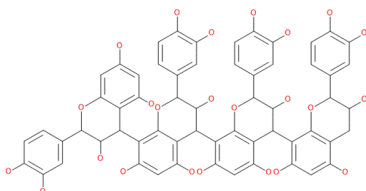

*Anacardium occidentale*

[25]

Vanillin

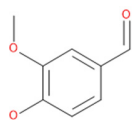

*Areca catechu*

[30]

$\alpha$ -linolenic acid

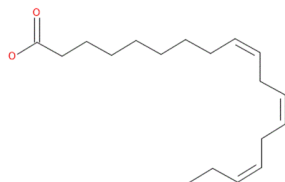

*Anacardium occidentale*,

[32,42]

*Glochidion zeylanicum*

---

**Table S4.** Molecular docking results between phytochemical compounds and the binding site of elastase (3HGP).

| No. | Compound                                    | MW      | Binding energy (kcal/mol) | Inhibition Constant | Number of hydrogen bond | Amino acid interaction | Bond length (Å) |
|-----|---------------------------------------------|---------|---------------------------|---------------------|-------------------------|------------------------|-----------------|
| 1   | FRW (original inhibitor)                    | 513.51  | -7.14                     | 5.80 $\mu$ M        | 9                       | A:HIS57                | 2.52350         |
|     |                                             |         |                           |                     |                         | A:HIS57                | 2.75545         |
|     |                                             |         |                           |                     |                         | A:THR175               | 2.24654         |
|     |                                             |         |                           |                     |                         | A:GLY193               | 2.33614         |
|     |                                             |         |                           |                     |                         | A:GLY193               | 2.47173         |
|     |                                             |         |                           |                     |                         | A:SER195               | 2.46901         |
|     |                                             |         |                           |                     |                         | A:VAL216               | 2.18525         |
|     |                                             |         |                           |                     |                         | A:VAL216               | 2.21136         |
|     |                                             |         |                           |                     |                         | A:GLN192               | 2.64759         |
|     | Epigallocatechin gallate (positive control) | 458.37  | -9.69                     | 79.13 nM            | 16                      | A:THR41                | 2.57071         |
|     |                                             |         |                           |                     |                         | A:ARG61                | 2.53699         |
|     |                                             |         |                           |                     |                         | A:ARG61                | 2.34579         |
|     |                                             |         |                           |                     |                         | A:CYS191               | 2.70525         |
|     |                                             |         |                           |                     |                         | A:GLY193               | 2.13234         |
|     |                                             |         |                           |                     |                         | A:GLY193               | 1.99259         |
|     |                                             |         |                           |                     |                         | A:ASP194               | 2.85786         |
|     |                                             |         |                           |                     |                         | A:ASP194               | 2.95908         |
|     |                                             |         |                           |                     |                         | A:SER195               | 2.27809         |
|     |                                             |         |                           |                     |                         | A:SER195               | 2.85192         |
|     |                                             |         |                           |                     |                         | A:VAL216               | 2.32268         |
|     |                                             |         |                           |                     |                         | A:SER217               | 2.68922         |
|     |                                             |         |                           |                     |                         | A:CYS191               | 3.08133         |
|     |                                             |         |                           |                     |                         | A:CYS191               | 2.48834         |
|     |                                             |         |                           |                     |                         | A:THR41                | 3.24692         |
|     |                                             |         |                           |                     |                         | A:THR41                | 3.04781         |
|     | Tetramer of proanthocyanidin                | 1155.02 | -11.95                    | 1.75 nM             | 18                      | A:HIS57                | 2.78926         |
|     |                                             |         |                           |                     |                         | A:VAL99                | 2.06369         |
|     |                                             |         |                           |                     |                         | A:GLY193               | 2.67412         |
|     |                                             |         |                           |                     |                         | A:SER195               | 2.67016         |
|     |                                             |         |                           |                     |                         | A:VAL216               | 2.58477         |
|     |                                             |         |                           |                     |                         | A:ARG217A              | 2.14988         |
|     |                                             |         |                           |                     |                         | A:ASP97                | 2.49907         |
|     |                                             |         |                           |                     |                         | A:VAL216               | 3.23714         |
|     |                                             |         |                           |                     |                         | A:CYS191               | 3.28470         |
|     |                                             |         |                           |                     |                         | A:SER195               | 2.59907         |
|     |                                             |         |                           |                     |                         | A:SER195               | 2.58138         |

|   |                                       |        |        |           |    |           |         |
|---|---------------------------------------|--------|--------|-----------|----|-----------|---------|
|   |                                       |        |        |           |    | A:THR41   | 2.90533 |
|   |                                       |        |        |           |    | A:CYS42   | 3.17172 |
|   |                                       |        |        |           |    | A:CYS42   | 2.90763 |
|   |                                       |        |        |           |    | A:HIS57   | 3.36115 |
|   |                                       |        |        |           |    | A:CYS58   | 3.15629 |
|   |                                       |        |        |           |    | A:ASP97   | 2.52302 |
|   |                                       |        |        |           |    | A:CYS58   | 2.85453 |
| 2 | Amentoflavone                         | 538.46 | -11.81 | 2.21 nM   | 7  | A:VAL99   | 2.04173 |
|   |                                       |        |        |           |    | A:GLY193  | 1.97784 |
|   |                                       |        |        |           |    | A:ASP194  | 2.81399 |
|   |                                       |        |        |           |    | A:SER195  | 2.08605 |
|   |                                       |        |        |           |    | A:VAL216  | 2.95069 |
|   |                                       |        |        |           |    | A:VAL216  | 3.13572 |
|   |                                       |        |        |           |    | A:ARG217A | 3.56022 |
| 3 | Rutin                                 | 610.52 | -10.12 | 38.08 nM  | 12 | A:VAL99   | 2.15421 |
|   |                                       |        |        |           |    | A:GLY193  | 2.01978 |
|   |                                       |        |        |           |    | A:ASP194  | 2.68737 |
|   |                                       |        |        |           |    | A:SER195  | 2.03458 |
|   |                                       |        |        |           |    | A:ARG217A | 2.89183 |
|   |                                       |        |        |           |    | A:ARG217A | 2.16727 |
|   |                                       |        |        |           |    | A:ARG217A | 3.00142 |
|   |                                       |        |        |           |    | A:ARG217A | 2.77342 |
|   |                                       |        |        |           |    | A:ASP97   | 3.13763 |
|   |                                       |        |        |           |    | A:CYS191  | 2.70211 |
|   |                                       |        |        |           |    | A:GLN192  | 2.85245 |
|   |                                       |        |        |           |    | A:ASP97   | 2.94995 |
| 4 | Agathisflavone                        | 538.46 | -9.92  | 53.93 nM  | 0  |           |         |
| 5 | Kaempferol 3-O-gentiobioside          | 610.52 | -9.73  | 73.92 nM  | 8  | A:HIS57   | 3.05099 |
|   |                                       |        |        |           |    | A:VAL99   | 2.83989 |
|   |                                       |        |        |           |    | A:ARG217A | 1.83288 |
|   |                                       |        |        |           |    | A:ARG217A | 2.67981 |
|   |                                       |        |        |           |    | A:ASP97   | 2.69662 |
|   |                                       |        |        |           |    | A:ASP98   | 3.35512 |
|   |                                       |        |        |           |    | A:ASP98   | 3.27145 |
|   |                                       |        |        |           |    | A:PHE215  | 4.19666 |
| 6 | Kaempferol 3-O-beta-L-glucopyranoside | 448.38 | -9.36  | 136.73 nM | 9  | A:VAL99   | 2.35829 |
|   |                                       |        |        |           |    | A:GLY193  | 2.07372 |
|   |                                       |        |        |           |    | A:ASP194  | 2.84954 |
|   |                                       |        |        |           |    | A:SER195  | 2.16655 |
|   |                                       |        |        |           |    | A:VAL216  | 2.54727 |
|   |                                       |        |        |           |    | A:ASP97   | 3.15783 |

|    |              |        |       |           |    |           |         |
|----|--------------|--------|-------|-----------|----|-----------|---------|
| 7  | Isoquercetin | 464.38 | -9.26 | 162.78 nM | 9  | A:ASP97   | 3.22664 |
|    |              |        |       |           |    | A:PHE215  | 2.94950 |
|    |              |        |       |           |    | A:VAL216  | 3.24286 |
|    |              |        |       |           |    | A:ARG61   | 2.97515 |
|    |              |        |       |           |    | A:ARG61   | 2.54804 |
|    |              |        |       |           |    | A:ARG61   | 2.90630 |
|    |              |        |       |           |    | A:GLY193  | 2.03511 |
|    |              |        |       |           |    | A:ASP194  | 2.58534 |
|    |              |        |       |           |    | A:SER195  | 2.03300 |
| 8  | Naringin     | 580.53 | -9.16 | 192.85 nM | 16 | A:VAL216  | 2.68435 |
|    |              |        |       |           |    | A:VAL216  | 2.75760 |
|    |              |        |       |           |    | A:PHE215  | 2.95244 |
|    |              |        |       |           |    | A:ARG61   | 2.66162 |
|    |              |        |       |           |    | A:ARG61   | 3.06606 |
|    |              |        |       |           |    | A:GLN192  | 2.03957 |
|    |              |        |       |           |    | A:GLY193  | 1.99418 |
|    |              |        |       |           |    | A:GLY193  | 2.19799 |
|    |              |        |       |           |    | A:ASP194  | 2.67659 |
|    |              |        |       |           |    | A:SER195  | 3.05382 |
|    |              |        |       |           |    | A:SER195  | 2.27226 |
|    |              |        |       |           |    | A:CYS191  | 2.79285 |
|    |              |        |       |           |    | A:VAL216  | 2.79621 |
|    |              |        |       |           |    | A:SER214  | 2.75276 |
|    |              |        |       |           |    | A:ARG61   | 3.35884 |
|    |              |        |       |           |    | A:ARG217A | 3.35938 |
| 9  | Glycitin     | 446.40 | -8.67 | 439.04 nM | 10 | A:SER217  | 3.02352 |
|    |              |        |       |           |    | A:HIS57   | 2.98501 |
|    |              |        |       |           |    | A:HIS57   | 3.97829 |
|    |              |        |       |           |    | A:HIS57   | 2.85020 |
|    |              |        |       |           |    | A:ALA99A  | 1.87321 |
|    |              |        |       |           |    | A:CYS191  | 2.94348 |
|    |              |        |       |           |    | A:ASP194  | 2.72853 |
|    |              |        |       |           |    | A:SER195  | 2.47003 |
|    |              |        |       |           |    | A:CYS191  | 2.54852 |
|    |              |        |       |           |    | A:ASP98   | 3.36807 |
| 10 | Myricetin    | 318.24 | -8.53 | 561.70 nM | 8  | A:ASP97   | 3.09022 |
|    |              |        |       |           |    | A:VAL216  | 2.84750 |
|    |              |        |       |           |    | A:VAL216  | 3.13688 |
|    |              |        |       |           |    | A:GLY193  | 2.07707 |
|    |              |        |       |           |    | A:ASP194  | 2.86297 |
|    |              |        |       |           |    | A:SER195  | 2.21726 |

|    |              |        |       |              |   |           |         |
|----|--------------|--------|-------|--------------|---|-----------|---------|
|    |              |        |       |              |   | A:VAL216  | 2.50270 |
|    |              |        |       |              |   | A:ARG217A | 3.06755 |
|    |              |        |       |              |   | A:SER217  | 3.21367 |
|    |              |        |       |              |   | A:ARG217A | 3.73332 |
|    |              |        |       |              |   | A:VAL216  | 3.19504 |
| 11 | Epicatechin  | 290.27 | -8.47 | 618.86 nM    | 8 | A:HIS57   | 3.01160 |
|    |              |        |       |              |   | A:GLY193  | 2.04469 |
|    |              |        |       |              |   | A:ASP194  | 2.83623 |
|    |              |        |       |              |   | A:SER195  | 2.17262 |
|    |              |        |       |              |   | A:VAL216  | 2.60128 |
|    |              |        |       |              |   | A:SER214  | 2.84466 |
|    |              |        |       |              |   | A:VAL216  | 3.24085 |
|    |              |        |       |              |   | A:HIS57   | 4.04784 |
| 12 | Quercetin    | 302.24 | -8.39 | 707.97 nM    | 6 | A:GLY193  | 2.07626 |
|    |              |        |       |              |   | A:ASP194  | 2.85099 |
|    |              |        |       |              |   | A:SER195  | 2.20819 |
|    |              |        |       |              |   | A:VAL216  | 2.49512 |
|    |              |        |       |              |   | A:SER217  | 2.95390 |
|    |              |        |       |              |   | A:VAL216  | 3.20176 |
| 13 | Catechin     | 290.27 | -8.31 | 812.28 nM    | 5 | A:GLY193  | 2.04521 |
|    |              |        |       |              |   | A:ASP194  | 2.83797 |
|    |              |        |       |              |   | A:SER195  | 2.17203 |
|    |              |        |       |              |   | A:VAL216  | 2.62754 |
|    |              |        |       |              |   | A:VAL216  | 3.09925 |
| 14 | Ginkgolide B | 424.40 | -8.28 | 855.21 nM    | 7 | A:HIS57   | 2.16026 |
|    |              |        |       |              |   | A:GLN192  | 2.28679 |
|    |              |        |       |              |   | A:GLY193  | 2.44387 |
|    |              |        |       |              |   | A:SER195  | 2.42828 |
|    |              |        |       |              |   | A:VAL216  | 2.77862 |
|    |              |        |       |              |   | A:VAL216  | 2.26792 |
|    |              |        |       |              |   | A:GLN192  | 3.22896 |
| 15 | Chrysoeriol  | 300.26 | -8.15 | 1.06 $\mu$ M | 5 | A:GLY193  | 2.09633 |
|    |              |        |       |              |   | A:ASP194  | 2.86127 |
|    |              |        |       |              |   | A:SER195  | 2.24263 |
|    |              |        |       |              |   | A:VAL216  | 2.43954 |
|    |              |        |       |              |   | A:VAL216  | 3.25443 |
| 16 | Diosmetin    | 300.26 | -8.14 | 1.08 $\mu$ M | 6 | A:GLY193  | 2.09905 |
|    |              |        |       |              |   | A:ASP194  | 2.87765 |
|    |              |        |       |              |   | A:SER195  | 2.25027 |
|    |              |        |       |              |   | A:VAL216  | 2.43233 |
|    |              |        |       |              |   | A:SER217  | 3.02011 |



|    |                             |        |       |              |    |          |         |
|----|-----------------------------|--------|-------|--------------|----|----------|---------|
| 17 | Kaempferol                  | 286.24 | -8.14 | 1.09 $\mu$ M | 5  | A:VAL216 | 3.28497 |
|    |                             |        |       |              |    | A:GLY193 | 2.08399 |
|    |                             |        |       |              |    | A:ASP194 | 2.85703 |
|    |                             |        |       |              |    | A:SER195 | 2.22547 |
| 18 | Apigenin                    | 270.24 | -7.98 | 1.42 $\mu$ M | 5  | A:VAL216 | 2.48090 |
|    |                             |        |       |              |    | A:VAL216 | 3.15619 |
|    |                             |        |       |              |    | A:GLY193 | 2.08842 |
|    |                             |        |       |              |    | A:ASP194 | 2.85822 |
| 19 | Oxyresveratrol              | 244.24 | -7.75 | 2.08 $\mu$ M | 5  | A:SER195 | 2.23099 |
|    |                             |        |       |              |    | A:VAL216 | 2.45696 |
|    |                             |        |       |              |    | A:VAL216 | 3.28784 |
|    |                             |        |       |              |    | A:GLY193 | 1.98392 |
| 20 | Emodin                      | 270.24 | -7.67 | 2.39 $\mu$ M | 5  | A:ASP194 | 2.50978 |
|    |                             |        |       |              |    | A:SER195 | 1.99662 |
|    |                             |        |       |              |    | A:VAL216 | 2.00620 |
|    |                             |        |       |              |    | A:VAL216 | 2.70284 |
| 21 | Aloe-emodin                 | 270.24 | -7.65 | 2.47 $\mu$ M | 7  | A:GLY193 | 2.83596 |
|    |                             |        |       |              |    | A:GLY193 | 1.98415 |
|    |                             |        |       |              |    | A:ASP194 | 2.49870 |
|    |                             |        |       |              |    | A:SER195 | 1.99120 |
| 22 | Rhein                       | 284.22 | -7.35 | 4.11 $\mu$ M | 10 | A:VAL216 | 2.06841 |
|    |                             |        |       |              |    | A:GLY193 | 2.80483 |
|    |                             |        |       |              |    | A:GLY193 | 2.00453 |
|    |                             |        |       |              |    | A:ASP194 | 2.49731 |
| 23 | Resveratrol 4'-methyl ether | 242.27 | -7.12 | 6.05 $\mu$ M | 4  | A:SER195 | 2.01419 |
|    |                             |        |       |              |    | A:VAL216 | 2.13841 |
|    |                             |        |       |              |    | A:PHE215 | 2.98478 |
|    |                             |        |       |              |    | A:PHE215 | 3.14578 |
|    |                             |        |       |              |    | A:ARG61  | 2.09898 |
|    |                             |        |       |              |    | A:ARG61  | 2.07925 |
|    |                             |        |       |              |    | A:GLY193 | 1.86295 |
|    |                             |        |       |              |    | A:GLY193 | 2.02935 |
|    |                             |        |       |              |    | A:ASP194 | 2.95764 |
|    |                             |        |       |              |    | A:SER195 | 3.08050 |
|    |                             |        |       |              |    | A:SER195 | 2.23777 |
|    |                             |        |       |              |    | A:CYS191 | 2.88867 |
|    |                             |        |       |              |    | A:THR41  | 2.61189 |
|    |                             |        |       |              |    | A:CYS42  | 3.68229 |
|    |                             |        |       |              |    | A:SER195 | 2.03502 |
|    |                             |        |       |              |    | A:GLY193 | 2.00145 |
|    |                             |        |       |              |    | A:ASP194 | 2.56312 |

|    |                          |        |       |                |   |           |         |
|----|--------------------------|--------|-------|----------------|---|-----------|---------|
| 24 | Gallic acid              | 170.12 | -5.92 | 45.66 $\mu$ M  | 6 | A:ARG217A | 2.54819 |
|    |                          |        |       |                |   | A:GLY193  | 2.08325 |
|    |                          |        |       |                |   | A:ASP194  | 2.63537 |
|    |                          |        |       |                |   | A:SER195  | 2.63215 |
|    |                          |        |       |                |   | A:SER195  | 2.15255 |
|    |                          |        |       |                |   | A:VAL216  | 2.09269 |
| 25 | Octadecatrienoic acid    | 278.43 | -5.70 | 65.93 $\mu$ M  | 2 | A:CYS191  | 2.89322 |
|    |                          |        |       |                |   | A:ARG217A | 1.99352 |
| 26 | Phytol                   | 296.53 | -5.53 | 88.41 $\mu$ M  | 2 | A:ARG217A | 2.50481 |
|    |                          |        |       |                |   | A:ARG217A | 2.18541 |
| 27 | $\alpha$ -linolenic acid | 278.43 | -5.21 | 151.38 $\mu$ M | 2 | A:VAL216  | 3.16650 |
|    |                          |        |       |                |   | A:ARG217A | 2.41950 |
| 28 | Quinic acid              | 192.17 | -5.14 | 170.27 $\mu$ M | 7 | A:ARG217A | 2.12768 |
|    |                          |        |       |                |   | A:GLY193  | 2.14684 |
|    |                          |        |       |                |   | A:ASP194  | 2.27959 |
|    |                          |        |       |                |   | A:SER195  | 2.09585 |
|    |                          |        |       |                |   | A:VAL216  | 2.13330 |
|    |                          |        |       |                |   | A:CYS191  | 2.47275 |
| 29 | Linoleic acid            | 280.45 | -4.91 | 9.09 $\mu$ M   | 1 | A:CYS191  | 2.66879 |
|    |                          |        |       |                |   | A:SER195  | 2.72310 |
|    |                          |        |       |                |   | A:ARG217A | 2.45050 |
|    |                          |        |       |                |   | A:ARG217A | 2.09175 |
|    |                          |        |       |                |   | A:ARG217A | 1.92107 |
|    |                          |        |       |                |   | A:ARG217A | 2.14678 |
| 30 | Oleic acid               | 282.46 | -4.83 | 287.10 $\mu$ M | 1 | A:ARG217A | 2.88731 |
|    |                          |        |       |                |   | A:ARG217A | 2.88731 |
| 31 | Palmitic acid            | 256.42 | -4.58 | 438.97 $\mu$ M | 1 | A:GLY193  | 1.94803 |
|    |                          |        |       |                |   | A:ARG217A | 2.66437 |
| 32 | Pentadecanoic acid       | 242.40 | -4.45 | 543.69 $\mu$ M | 2 | A:ARG217A | 3.05706 |
|    |                          |        |       |                |   | A:ARG217A | 3.05706 |
| 33 | Benzoic acid             | 122.12 | -4.24 | 779.03 $\mu$ M | 1 | A:GLY193  | 1.94803 |
| 34 | Stearic acid             | 284.48 | -4.24 | 782.65 $\mu$ M | 2 | A:ARG217A | 2.66437 |
|    |                          |        |       |                |   | A:ARG217A | 3.05706 |
| 35 | Myristic acid            | 228.37 | -4.22 | 802.18 $\mu$ M | 0 |           |         |
| 36 | L-proline                | 115.13 | -3.87 | 1.46 mM        | 3 | A:ARG61   | 2.71531 |
|    |                          |        |       |                |   | A:ASP60   | 3.20048 |
|    |                          |        |       |                |   | A:ASP60   | 3.49653 |
| 37 | Hexanedioic acid         | 146.14 | -3.74 | 1.80 mM        | 4 | A:ARG217A | 1.99619 |
|    |                          |        |       |                |   | A:ARG217A | 1.83030 |
|    |                          |        |       |                |   | A:ARG217A | 1.97210 |
|    |                          |        |       |                |   | A:VAL216  | 2.99642 |
| 38 | n-dotriacontanol         | 466.87 | -3.18 | 4.67 mM        | 3 | A:ARG61   | 3.19083 |
|    |                          |        |       |                |   | A:HIS57   | 3.27872 |
|    |                          |        |       |                |   | A:ASP97   | 3.67089 |
| 39 | n-triacontanol           | 438.81 | -2.26 | 21.96 mM       | 1 | A:THR175  | 2.14124 |

**Table S5.** Molecular docking results between phytochemical compounds and the binding site of tyrosinase (2Y9X).

| No. | Compound                       | MW      | Binding energy (kcal/mol) | Inhibition Constant | Number of hydrogen bond | Amino acid interaction | Bond length (Å) |
|-----|--------------------------------|---------|---------------------------|---------------------|-------------------------|------------------------|-----------------|
|     | Tropolone (original inhibitor) | 122.12  | -4.69                     | 364.55 $\mu$ M      | 1                       | A:HIS61                | 2.93039         |
|     | Kojic acid (positive control)  | 142.11  | -4.59                     | 430.35 $\mu$ M      | 8                       | A:ASN81                | 2.08063         |
|     |                                |         |                           |                     |                         | A:HIS85                | 2.32738         |
|     |                                |         |                           |                     |                         | A:GLU322               | 2.13654         |
|     |                                |         |                           |                     |                         | A:GLU322               | 3.04204         |
|     |                                |         |                           |                     |                         | A:CYS83                | 2.90731         |
|     |                                |         |                           |                     |                         | A:ASN320               | 3.42295         |
|     |                                |         |                           |                     |                         | A:GLU322               | 3.50682         |
|     |                                |         |                           |                     |                         | A:HIS85                | 2.51019         |
| 1   | o-Coumaric acid                | 164.16  | -10.42                    | 23.09 nM            | 4                       | A:HIS263               | 2.97779         |
|     |                                |         |                           |                     |                         | A:HIS296               | 3.00656         |
|     |                                |         |                           |                     |                         | A:MET280               | 2.94362         |
|     |                                |         |                           |                     |                         | A:HIS263               | 3.80402         |
| 2   | Tetramer of proanthocyanidin   | 1155.02 | -10.42                    | 22.83 nM            | 8                       | A:ASN81                | 1.94291         |
|     |                                |         |                           |                     |                         | A:ASN81                | 2.77879         |
|     |                                |         |                           |                     |                         | A:HIS244               | 2.25277         |
|     |                                |         |                           |                     |                         | A:ARG268               | 2.89527         |
|     |                                |         |                           |                     |                         | A:GLU322               | 3.20562         |
|     |                                |         |                           |                     |                         | A:MET280               | 2.71019         |
|     |                                |         |                           |                     |                         | A:HIS263               | 3.58654         |
|     |                                |         |                           |                     |                         | A:HIS263               | 3.11783         |
| 3   | Caffeic acid                   | 180.16  | -10.10                    | 39.74 nM            | 4                       | A:HIS61                | 3.00165         |
|     |                                |         |                           |                     |                         | A:HIS263               | 3.35274         |
|     |                                |         |                           |                     |                         | A:HIS296               | 2.79428         |
|     |                                |         |                           |                     |                         | A:GLY281               | 3.27655         |
| 4   | Ferulic acid                   | 194.18  | -10.00                    | 46.75 nM            | 5                       | A:HIS61                | 3.04213         |
|     |                                |         |                           |                     |                         | A:HIS263               | 3.29735         |
|     |                                |         |                           |                     |                         | A:HIS296               | 2.80888         |
|     |                                |         |                           |                     |                         | A:GLY281               | 3.32939         |
|     |                                |         |                           |                     |                         | A:ASN260               | 3.13639         |
| 5   | Arecatannin A1                 | 866.77  | -9.94                     | 110.38 nM           | 10                      | A:ASN81                | 2.38646         |
|     |                                |         |                           |                     |                         | A:ARG268               | 3.05168         |
|     |                                |         |                           |                     |                         | A:GLY281               | 2.84476         |
|     |                                |         |                           |                     |                         | A:SER282               | 2.74566         |
|     |                                |         |                           |                     |                         | A:ALA246               | 2.90249         |

|    |                          |        |       |           |    |          |         |
|----|--------------------------|--------|-------|-----------|----|----------|---------|
|    |                          |        |       |           |    | A:ALA323 | 3.06850 |
|    |                          |        |       |           |    | A:CYS83  | 2.57007 |
|    |                          |        |       |           |    | A:PRO284 | 3.04284 |
|    |                          |        |       |           |    | A:ASN81  | 3.22583 |
|    |                          |        |       |           |    | A:HIS244 | 3.54321 |
| 6  | Octadecatrienoic acid    | 278.43 | -9.87 | 58.62 nM  | 2  | A:HIS94  | 3.16054 |
|    |                          |        |       |           |    | A:HIS296 | 2.82951 |
| 7  | Gallic acid              | 170.12 | -9.65 | 84.78 nM  | 5  | A:SER282 | 3.06267 |
|    |                          |        |       |           |    | A:HIS263 | 3.09352 |
|    |                          |        |       |           |    | A:HIS296 | 2.81572 |
|    |                          |        |       |           |    | A:MET280 | 3.15132 |
|    |                          |        |       |           |    | A:ASN260 | 2.88933 |
| 8  | Quinic acid              | 192.17 | -9.63 | 88.03 nM  | 6  | A:ASN260 | 3.18435 |
|    |                          |        |       |           |    | A:MET280 | 2.74930 |
|    |                          |        |       |           |    | A:HIS61  | 3.32578 |
|    |                          |        |       |           |    | A:HIS263 | 3.55667 |
|    |                          |        |       |           |    | A:HIS263 | 3.32810 |
|    |                          |        |       |           |    | A:HIS85  | 2.93841 |
| 9  | Syringic acid            | 198.17 | -9.56 | 98.46 nM  | 4  | A:HIS263 | 2.89886 |
|    |                          |        |       |           |    | A:HIS296 | 3.13860 |
|    |                          |        |       |           |    | A:MET280 | 3.35634 |
|    |                          |        |       |           |    | A:GLU256 | 3.11772 |
| 10 | Arecatannin B1           | 866.77 | -9.52 | 104.57 nM | 11 | A:HIS85  | 2.74069 |
|    |                          |        |       |           |    | A:HIS85  | 1.66258 |
|    |                          |        |       |           |    | A:VAL248 | 2.01703 |
|    |                          |        |       |           |    | A:ARG268 | 1.95436 |
|    |                          |        |       |           |    | A:ALA246 | 2.65678 |
|    |                          |        |       |           |    | A:ALA246 | 3.25979 |
|    |                          |        |       |           |    | A:GLU322 | 3.39371 |
|    |                          |        |       |           |    | A:MET257 | 3.34050 |
|    |                          |        |       |           |    | A:CYS83  | 3.17367 |
|    |                          |        |       |           |    | A:CYS83  | 2.92554 |
|    |                          |        |       |           |    | A:HIS244 | 3.48197 |
| 11 | Amentoflavone            | 538.46 | -9.37 | 136.28 nM | 6  | A:ASN81  | 2.32368 |
|    |                          |        |       |           |    | A:ASN81  | 2.09600 |
|    |                          |        |       |           |    | A:GLU322 | 3.01671 |
|    |                          |        |       |           |    | A:CYS83  | 2.80356 |
|    |                          |        |       |           |    | A:HIS85  | 2.79983 |
|    |                          |        |       |           |    | A:HIS263 | 3.30620 |
| 12 | $\alpha$ -linolenic acid | 278.43 | -9.32 | 146.97 nM | 2  | A:HIS94  | 3.22968 |
|    |                          |        |       |           |    | A:HIS94  | 3.83676 |

|    |                              |        |       |              |    |          |         |
|----|------------------------------|--------|-------|--------------|----|----------|---------|
| 13 | Benzoic acid                 | 122.12 | -9.26 | 163.00 nM    | 1  | A:HIS94  | 3.36341 |
| 14 | Pentadecanoic acid           | 242.40 | -8.90 | 300.01 nM    | 2  | A:HIS263 | 3.03186 |
|    |                              |        |       |              |    | A:HIS296 | 2.88041 |
| 15 | Palmitic acid                | 256.42 | -8.86 | 318.21 nM    | 2  | A:HIS61  | 2.79886 |
|    |                              |        |       |              |    | A:HIS296 | 2.77369 |
| 16 | Hexanedioic acid             | 146.14 | -8.68 | 433.58 nM    | 3  | A:HIS94  | 3.16234 |
|    |                              |        |       |              |    | A:HIS94  | 3.76420 |
|    |                              |        |       |              |    | A:HIS263 | 3.40059 |
| 17 | Arecaidine                   | 141.17 | -8.59 | 502.24 nM    | 3  | A:HIS263 | 2.92899 |
|    |                              |        |       |              |    | A:HIS296 | 3.09977 |
|    |                              |        |       |              |    | A:ASN260 | 3.00512 |
| 18 | Galocatechin gallate         | 458.37 | -8.41 | 679.90 nM    | 9  | A:ASN260 | 2.09290 |
|    |                              |        |       |              |    | A:ARG268 | 2.17559 |
|    |                              |        |       |              |    | A:VAL283 | 1.77894 |
|    |                              |        |       |              |    | A:SER282 | 3.26428 |
|    |                              |        |       |              |    | A:HIS61  | 3.51813 |
|    |                              |        |       |              |    | A:HIS85  | 2.99297 |
|    |                              |        |       |              |    | A:HIS259 | 2.97683 |
|    |                              |        |       |              |    | A:ARG268 | 3.56983 |
|    |                              |        |       |              |    | A:HIS263 | 3.39447 |
| 19 | Agathisflavone               | 538.46 | -8.23 | 934.62 nM    | 5  | A:ASN81  | 2.58158 |
|    |                              |        |       |              |    | A:ASN260 | 2.99061 |
|    |                              |        |       |              |    | A:ASN260 | 3.75864 |
|    |                              |        |       |              |    | A:HIS85  | 2.54527 |
|    |                              |        |       |              |    | A:VAL283 | 2.89718 |
| 20 | Epigallocatechin gallate     | 458.37 | -8.08 | 1.19 $\mu$ M | 6  | A:ASN260 | 2.28274 |
|    |                              |        |       |              |    | A:SER282 | 3.03305 |
|    |                              |        |       |              |    | A:MET280 | 3.02781 |
|    |                              |        |       |              |    | A:HIS61  | 3.22370 |
|    |                              |        |       |              |    | A:HIS259 | 3.11352 |
|    |                              |        |       |              |    | A:HIS263 | 3.53154 |
| 21 | Guvacine                     | 127.14 | -7.93 | 1.53 $\mu$ M | 0  |          |         |
| 22 | Isorhamnetin-3-O-galactoside | 478.40 | -7.78 | 1.97 $\mu$ M | 10 | A:ARG268 | 2.61244 |
|    |                              |        |       |              |    | A:ARG268 | 2.15888 |
|    |                              |        |       |              |    | A:MET280 | 3.23812 |
|    |                              |        |       |              |    | A:MET280 | 2.88616 |
|    |                              |        |       |              |    | A:ASN260 | 2.74567 |
|    |                              |        |       |              |    | A:HIS259 | 3.24854 |
|    |                              |        |       |              |    | A:HIS263 | 3.50211 |
|    |                              |        |       |              |    | A:PHE264 | 3.92479 |
|    |                              |        |       |              |    | A:PHE264 | 3.89086 |

|    |                           |        |       |              |   |          |         |
|----|---------------------------|--------|-------|--------------|---|----------|---------|
| 23 | Isoquercetin              | 464.38 | -7.74 | 2.11 $\mu$ M | 7 | A:HIS263 | 3.31541 |
|    |                           |        |       |              |   | A:VAL283 | 1.95856 |
|    |                           |        |       |              |   | A:HIS259 | 3.58479 |
|    |                           |        |       |              |   | A:ARG268 | 2.92003 |
|    |                           |        |       |              |   | A:PRO284 | 3.18679 |
|    |                           |        |       |              |   | A:GLY281 | 2.96963 |
|    |                           |        |       |              |   | A:HIS263 | 3.04766 |
|    |                           |        |       |              |   | A:HIS263 | 4.03417 |
|    |                           |        |       |              |   | A:VAL283 | 1.85543 |
|    |                           |        |       |              |   | A:SER282 | 3.32748 |
| 24 | Quercetin-3-O-galactoside | 464.38 | -7.67 | 2.37 $\mu$ M | 8 | A:HIS61  | 3.72991 |
|    |                           |        |       |              |   | A:HIS259 | 3.40187 |
|    |                           |        |       |              |   | A:ARG268 | 2.91088 |
|    |                           |        |       |              |   | A:PRO284 | 3.11048 |
|    |                           |        |       |              |   | A:GLY281 | 2.91699 |
|    |                           |        |       |              |   | A:HIS263 | 3.14255 |
|    |                           |        |       |              |   | A:HIS244 | 1.71048 |
|    |                           |        |       |              |   | A:ASN260 | 2.93145 |
|    |                           |        |       |              |   | A:GLY281 | 3.22566 |
|    |                           |        |       |              |   | A:HIS61  | 3.65135 |
| 25 | Rutin                     | 610.52 | -7.65 | 2.48 $\mu$ M | 7 | A:HIS259 | 3.37472 |
|    |                           |        |       |              |   | A:PRO284 | 3.47025 |
|    |                           |        |       |              |   | A:HIS263 | 3.19461 |
|    |                           |        |       |              |   | A:ARG268 | 2.01129 |
|    |                           |        |       |              |   | A:ARG268 | 2.11496 |
|    |                           |        |       |              |   | A:ARG268 | 2.66378 |
|    |                           |        |       |              |   | A:ARG268 | 1.79570 |
|    |                           |        |       |              |   | A:VAL283 | 1.91848 |
|    |                           |        |       |              |   | A:GLY281 | 2.78962 |
|    |                           |        |       |              |   | A:ARG268 | 2.88437 |
| 26 | Kaempferol-3-O-glucoside  | 448.38 | -7.40 | 3.79 $\mu$ M | 7 | A:HIS244 | 1.98915 |
|    |                           |        |       |              |   | A:HIS244 | 2.87322 |
|    |                           |        |       |              |   | A:HIS61  | 3.14519 |
|    |                           |        |       |              |   | A:HIS85  | 3.25815 |
|    |                           |        |       |              |   | A:HIS296 | 3.36954 |
|    |                           |        |       |              |   | A:HIS61  | 3.08605 |
|    |                           |        |       |              |   | A:HIS244 | 3.69317 |
|    |                           |        |       |              |   | A:HIS263 | 3.77767 |
|    |                           |        |       |              |   | A:HIS244 | 1.84683 |
|    |                           |        |       |              |   | A:HIS263 | 2.96751 |
| 27 | Myricetin                 | 318.24 | -7.04 | 6.92 $\mu$ M | 8 | A:SER282 | 3.07269 |
|    |                           |        |       |              |   |          |         |
|    |                           |        |       |              |   |          |         |
|    |                           |        |       |              |   |          |         |
| 28 | Gallocatechin             | 306.27 | -6.94 | 8.21 $\mu$ M | 5 |          |         |
|    |                           |        |       |              |   |          |         |

|    |                  |        |       |               |   |          |          |
|----|------------------|--------|-------|---------------|---|----------|----------|
|    |                  |        |       |               |   | A:MET280 | 2.71186  |
|    |                  |        |       |               |   | A:HIS244 | 3.94980  |
| 29 | Catechin         | 290.27 | -6.85 | 9.60 $\mu$ M  | 3 | A:ASN260 | 2.82593  |
|    |                  |        |       |               |   | A:HIS61  | 2.90610  |
|    |                  |        |       |               |   | A:PHE264 | 3.84711  |
| 30 | L-proline        | 115.13 | -6.85 | 9.59 $\mu$ M  | 3 | A:HIS263 | 2.82224  |
|    |                  |        |       |               |   | A:HIS296 | 3.06908  |
|    |                  |        |       |               |   | A:HIS259 | 3.74845  |
| 31 | Quercetin        | 302.24 | -6.78 | 10.76 $\mu$ M | 7 | A:HIS244 | 2.13838  |
|    |                  |        |       |               |   | A:HIS244 | 2.89602  |
|    |                  |        |       |               |   | A:HIS61  | 3.16356  |
|    |                  |        |       |               |   | A:HIS85  | 3.24592  |
|    |                  |        |       |               |   | A:HIS296 | 3.36613  |
|    |                  |        |       |               |   | A:HIS61  | 3.09307  |
|    |                  |        |       |               |   | A:HIS244 | 3.80014  |
| 32 | Epicatechin      | 290.27 | -6.69 | 12.58 $\mu$ M | 5 | A:ASN260 | 2.79798  |
|    |                  |        |       |               |   | A:HIS263 | 2.887000 |
|    |                  |        |       |               |   | A:VAL283 | 2.87757  |
|    |                  |        |       |               |   | A:MET280 | 2.73467  |
|    |                  |        |       |               |   | A:HIS85  | 2.90708  |
| 33 | Epigallocatechin | 306.27 | -6.68 | 12.71 $\mu$ M | 5 | A:HIS263 | 2.89927  |
|    |                  |        |       |               |   | A:VAL283 | 2.86357  |
|    |                  |        |       |               |   | A:MET280 | 2.74093  |
|    |                  |        |       |               |   | A:HIS85  | 2.86647  |
|    |                  |        |       |               |   | A:HIS263 | 3.62499  |
| 34 | Jacareubin       | 326.30 | -6.56 | 15.53 $\mu$ M | 3 | A:GLY281 | 2.99526  |
|    |                  |        |       |               |   | A:HIS85  | 2.95688  |
|    |                  |        |       |               |   | A:HIS259 | 2.99294  |
| 35 | Glycitin         | 446.40 | -6.47 | 18.22 $\mu$ M | 4 | A:VAL283 | 2.64301  |
|    |                  |        |       |               |   | A:MET280 | 2.62857  |
|    |                  |        |       |               |   | A:HIS61  | 2.89798  |
|    |                  |        |       |               |   | A:HIS263 | 3.31631  |
| 36 | Isorhamnetin     | 316.26 | -6.47 | 18.03 $\mu$ M | 7 | A:HIS244 | 2.54417  |
|    |                  |        |       |               |   | A:HIS263 | 2.94940  |
|    |                  |        |       |               |   | A:SER282 | 2.80771  |
|    |                  |        |       |               |   | A:MET280 | 2.49056  |
|    |                  |        |       |               |   | A:HIS85  | 2.85990  |
|    |                  |        |       |               |   | A:HIS259 | 3.71081  |
|    |                  |        |       |               |   | A:HIS263 | 3.83165  |
| 37 | Luteolin         | 286.24 | -6.44 | 18.97 $\mu$ M | 3 | A:ASN260 | 2.99906  |
|    |                  |        |       |               |   | A:MET280 | 3.36915  |

|    |                             |        |       |                |   |          |         |
|----|-----------------------------|--------|-------|----------------|---|----------|---------|
| 38 | Naringenin                  | 272.25 | -6.42 | 19.81 $\mu$ M  | 4 | A:HIS263 | 3.67221 |
|    |                             |        |       |                |   | A:SER282 | 2.50052 |
|    |                             |        |       |                |   | A:MET280 | 2.57025 |
|    |                             |        |       |                |   | A:HIS85  | 2.97900 |
| 39 | Kaempferol                  | 286.24 | -6.39 | 20.80 $\mu$ M  | 6 | A:HIS259 | 3.20637 |
|    |                             |        |       |                |   | A:HIS244 | 2.58376 |
|    |                             |        |       |                |   | A:HIS263 | 2.93476 |
|    |                             |        |       |                |   | A:SER282 | 2.81249 |
|    |                             |        |       |                |   | A:MET280 | 2.48505 |
| 40 | Chrysoeriol                 | 300.26 | -6.36 | 21.87 $\mu$ M  | 3 | A:HIS85  | 2.82651 |
|    |                             |        |       |                |   | A:HIS259 | 3.58735 |
|    |                             |        |       |                |   | A:ASN260 | 2.68258 |
|    |                             |        |       |                |   | A:MET280 | 3.29794 |
| 41 | Ginkgolide B                | 424.40 | -6.16 | 30.38 $\mu$ M  | 3 | A:HIS263 | 3.58794 |
|    |                             |        |       |                |   | A:HIS244 | 1.72866 |
|    |                             |        |       |                |   | A:ARG268 | 3.09288 |
| 42 | Oxyresveratrol              | 244.24 | -5.93 | 44.90 $\mu$ M  | 3 | A:ASN260 | 3.06936 |
|    |                             |        |       |                |   | A:ARG268 | 2.13044 |
|    |                             |        |       |                |   | A:MET280 | 2.81813 |
|    |                             |        |       |                |   | A:HIS263 | 3.77046 |
| 43 | Coumarin                    | 146.14 | -5.70 | 66.40 $\mu$ M  | 1 | A:HIS259 | 3.30589 |
| 44 | Resveratrol 4'-methyl ether | 242.27 | -5.66 | 71.36 $\mu$ M  | 2 | A:SER282 | 2.73416 |
|    |                             |        |       |                |   | A:MET280 | 2.77858 |
| 45 | Vanillin                    | 152.15 | -5.00 | 217.70 $\mu$ M | 2 | A:ASN260 | 3.28389 |
|    |                             |        |       |                |   | A:PHE264 | 3.77041 |
| 46 | Guvacoline                  | 141.17 | -4.95 | 234.06 $\mu$ M | 6 | A:ARG321 | 2.24586 |
|    |                             |        |       |                |   | A:ARG321 | 1.70808 |
|    |                             |        |       |                |   | A:HIS244 | 3.79383 |
|    |                             |        |       |                |   | A:GLY86  | 3.15994 |
|    |                             |        |       |                |   | A:GLU322 | 2.82850 |
|    |                             |        |       |                |   | A:GLU322 | 3.10460 |
| 47 | Phytol                      | 296.53 | -4.64 | 394.43 $\mu$ M | 0 |          |         |
| 48 | Arecoline                   | 155.19 | -4.56 | 450.69 $\mu$ M | 6 | A:CYS83  | 3.57655 |
|    |                             |        |       |                |   | A:HIS85  | 1.93297 |
|    |                             |        |       |                |   | A:ALA323 | 3.23921 |
|    |                             |        |       |                |   | A:THR84  | 3.69370 |
|    |                             |        |       |                |   | A:ASN320 | 3.21035 |
|    |                             |        |       |                |   | A:GLU322 | 3.59248 |

---
